# Supplementary material for: Nintedanib selectively inhibits the activation and tumour-promoting effects of fibroblasts from lung adenocarcinoma patients
Source: PubMed Central journal article supplement — Br J Cancer. 2017 Sep 12;117(8):1128–38. doi: 10.1038/bjc.2017.270 (PMC5674098; doi:10.1038/bjc.2017.270), 2017-09-12
Supplement: bjc2017270x1.pdf [file bjc2017270x1.pdf]

## SUPPLEMENTARY FIGURE S1

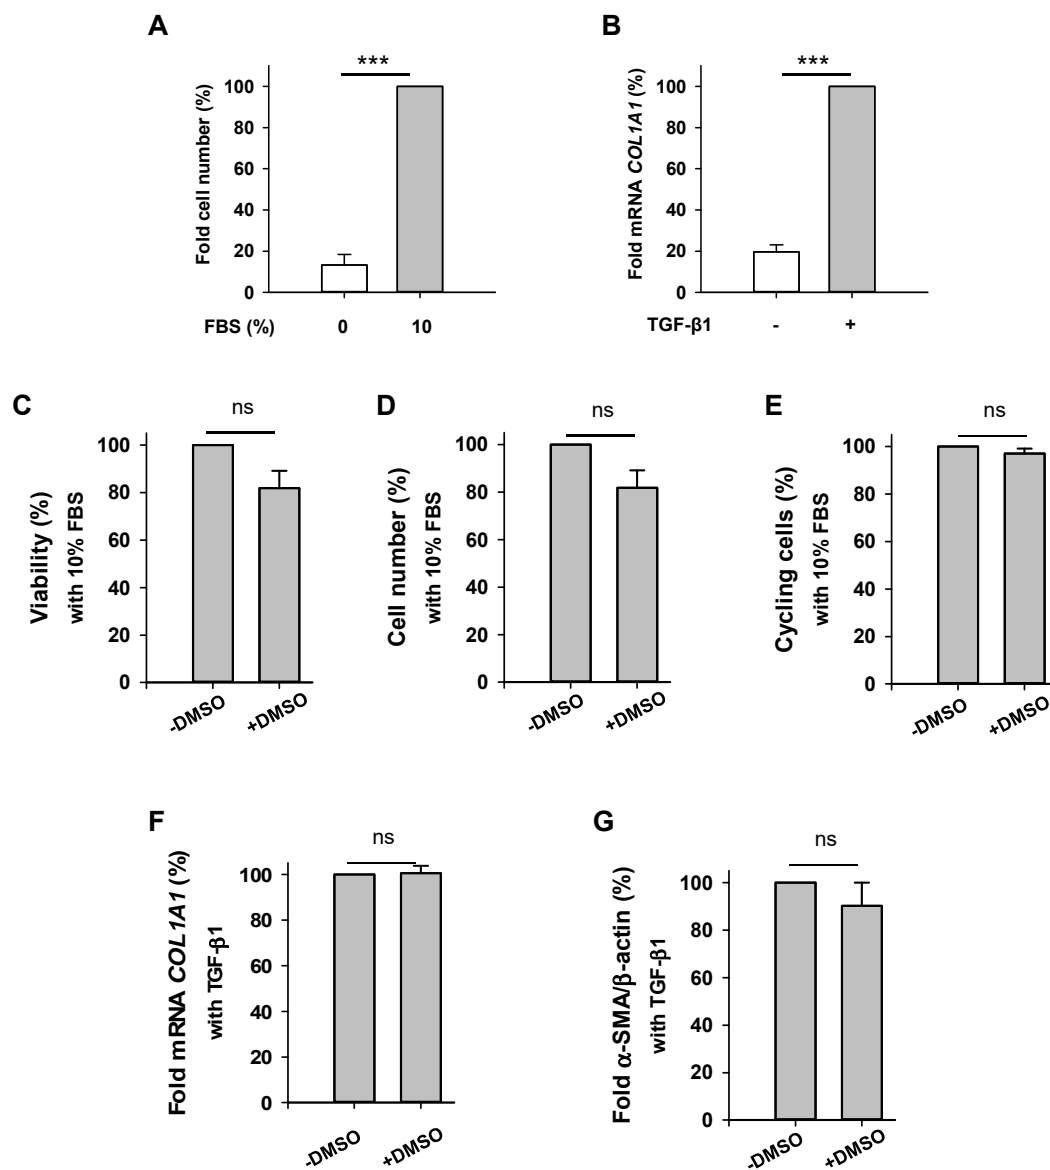

Supplementary Fig S1. (A) Increase in fibroblast number density elicited by 5 day treatment with 10% FBS compared to 0% FBS. (B) Increase in *COL1A1* mRNA expression in control fibroblasts elicited by 3 day treatment with 2.5 ng/ml TGF-β1. (C-G) Lack of effect of DMSO vehicle on the viability (C), fibroblast number density (D) and percentage of cycling fibroblasts (E) in control fibroblasts treated with 10% FBS for 5 days. (F-G) Lack of effect of DMSO vehicle on the expression of *COL1A1* (F) and α-SMA (G) of control fibroblasts treated with 2.5 ng/ml TGF-β1 for 3 days. \* $P \leq 0.05$ , \*\*  $P \leq 0.01$  and \*\*\*  $P \leq 0.005$  were determined by Student's *t*-test (n=3-5).

## SUPPLEMENTARY FIGURE S2

ADC TAFs  
SCC TAFs

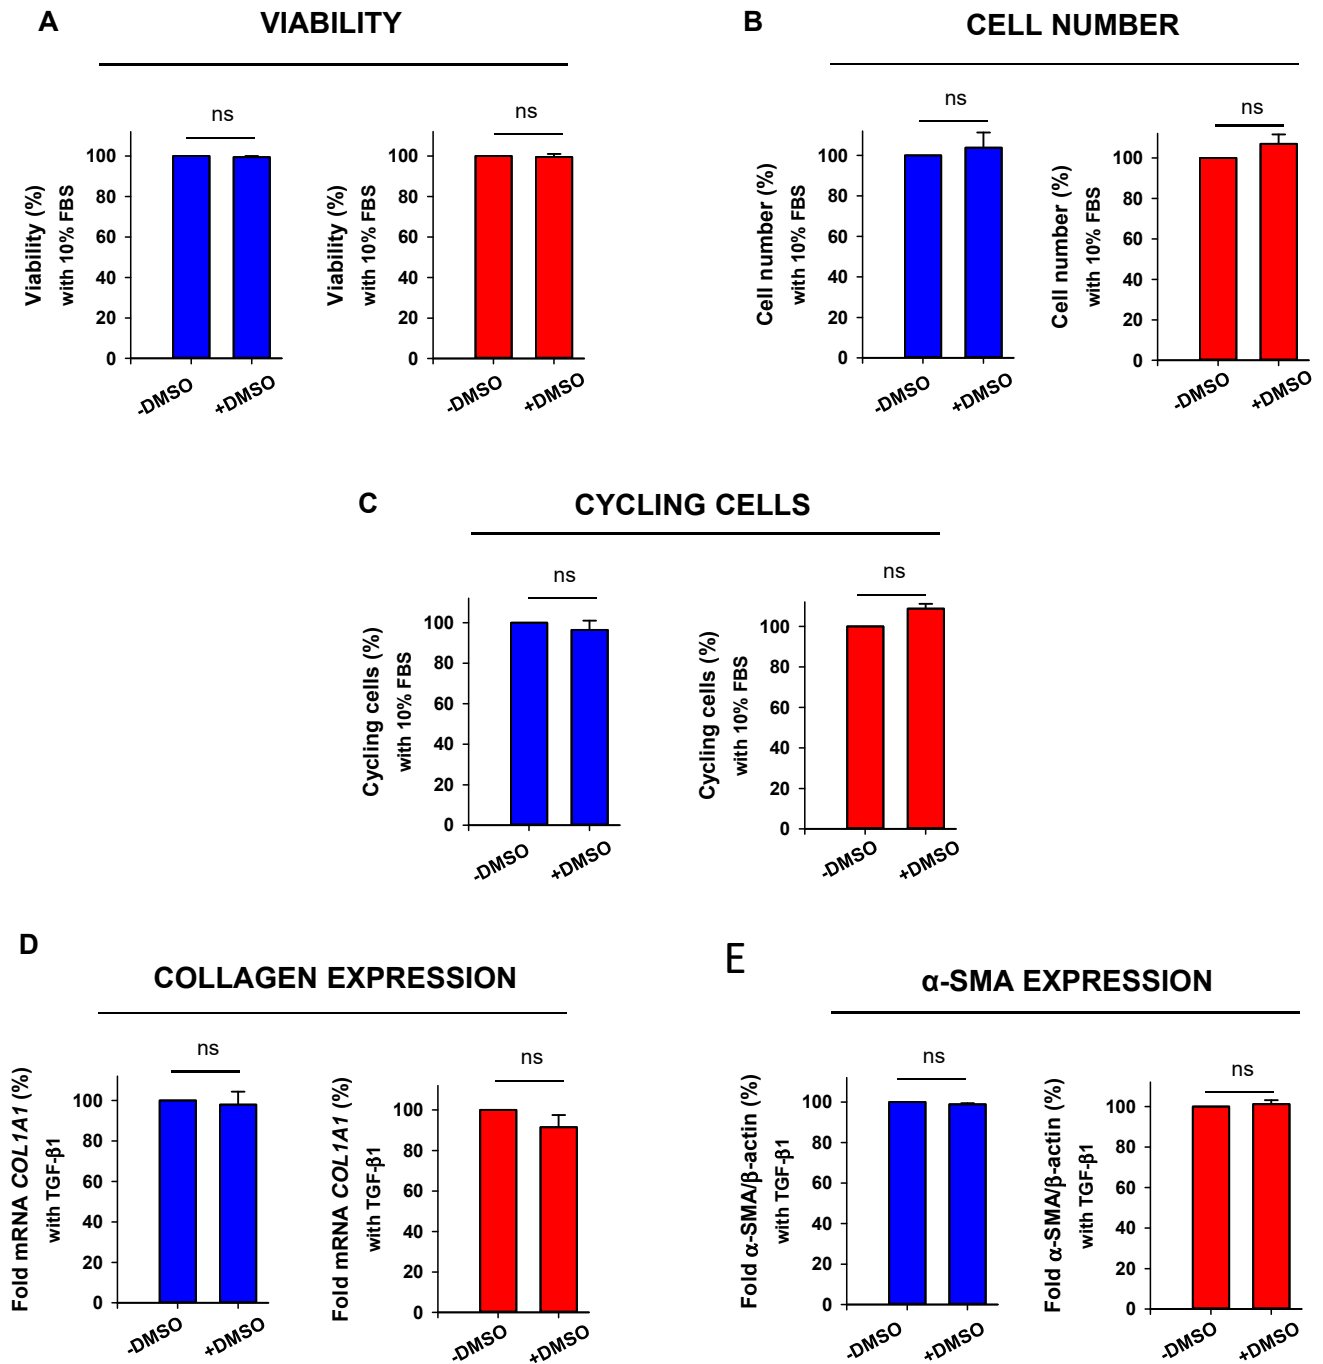

Supplementary Fig S2. Lack of effect of DMSO vehicle on ADC-TAFs and SCC-TAFs in terms of viability (A), fibroblast number density (B), percentage of cycling fibroblasts (C) and expression of *COL1A1* (D) or  $\alpha$ -SMA (E). TAFs were cultured as in Supplementary Fig. S1. \* $P \leq 0.05$ , \*\* $P \leq 0.01$  and \*\*\* $P \leq 0.005$  were determined by Student's *t*-test (n=3-6).

## SUPPLEMENTARY FIGURE S3

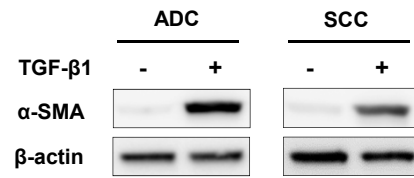

Supplementary Fig S3. Representative Western blot of the activation marker  $\alpha$ -SMA and  $\beta$ -actin (used as loading control) of ADC-TAFs and SCC-TAFs cultured in the absence or presence of 2.5 ng/ml TGF- $\beta$ 1

## SUPPLEMENTARY FIGURE S4

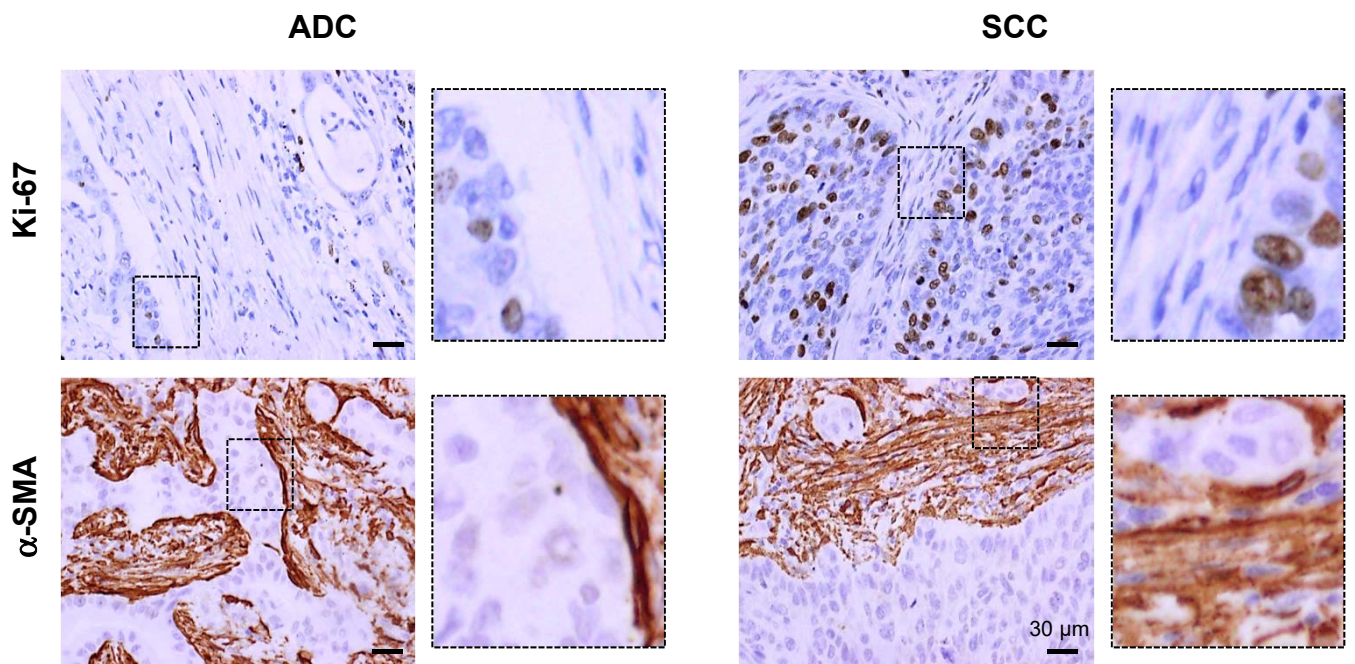

Supplementary Fig S4. Additional illustrative images of Ki-67 and  $\alpha$ -SMA stromal stainings in histologic sections from ADC and SCC patients obtained with a 40 $\times$  objective. Images were obtained from different patients than those used in Fig. 4



## SUPPLEMENTARY FIGURE S6

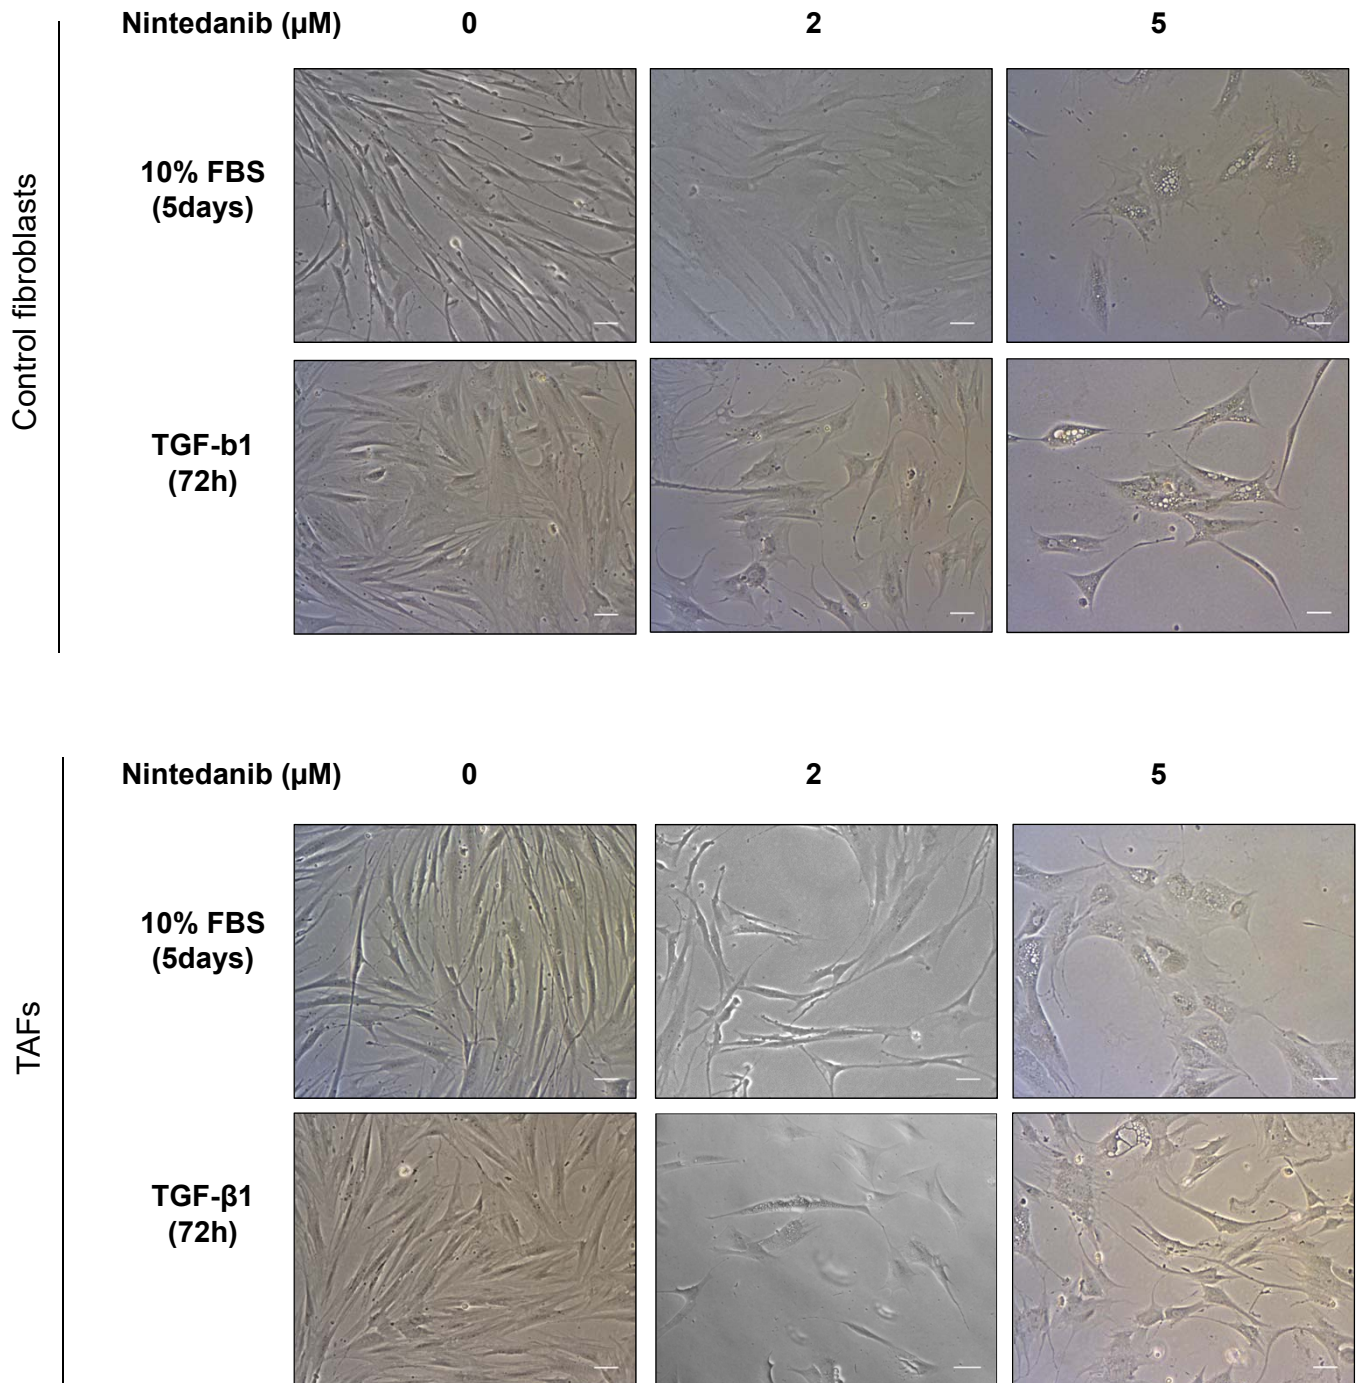

Supplementary Fig S6. Illustrative phase contrast images of control fibroblasts or TAFs stimulated with either 10% FBS for 5 days or 2.5 ng/ml TGF- $\beta$ 1 for 3 days in the presence of increasing nintedanib concentrations. Images were obtained with a 10 $\times$  objective. Vacuolar structures were readily observed at 5  $\mu\text{M}$  nintedanib in all conditions. Vacuolar structures at 2  $\mu\text{M}$  appeared to be more readily observed in fibroblasts cultured with TGF- $\beta$ 1 than with 10% FBS, and were overall less abundant than at 5  $\mu\text{M}$  nintedanib. No vacuolar structures were observed at lower nintedanib concentrations ( $\leq 1 \mu\text{M}$ ).
